# Supplementary material for: Inactivation of Minar2 in mice hyperactivates mTOR signaling and results in obesity
Source: PubMed Central journal article supplement (PMC10267597; doi:10.1016/j.molmet.2023.101744), 2023-05-26
Supplement: mmc1.pdf [file mmc1.pdf]

## Supplemental Information

### Inactivation of *Minar2* in Mice Hyperactivates mTOR Signaling and Results in Obesity

Saran Lotfollahzadeh<sup>1</sup>, Chaoshuang Xia<sup>2</sup>, Razie Amraei<sup>3</sup>, Ning Hua<sup>4</sup>, Konstantin V. Kandror<sup>5</sup>, Stephen R Farmer<sup>5</sup>, Wenyi Wei<sup>6</sup>, Catherine E Costello<sup>2,5\*</sup>, Vipul Chitalia<sup>1,7,8\*</sup>, Nader Rahimi<sup>3\*</sup>

<sup>1</sup>Renal Section, Department of Medicine, Boston University Chobanian & Avedisian School of Medicine, Boston, MA, USA. <sup>2</sup>Center for Biomedical Mass Spectrometry, Boston University Chobanian & Avedisian School of Medicine, Boston. <sup>3</sup>Department of Pathology and Laboratory Medicine, Boston University Chobanian & Avedisian School of Medicine, Boston, MA, USA. <sup>4</sup>Biomed Research Center, Boston University Chobanian & Avedisian School of Medicine. <sup>5</sup>Department of Biochemistry, Boston University Chobanian & Avedisian School of Medicine, Boston, MA, USA. <sup>6</sup>Department of Pathology, Beth Israel Deaconess Medical Center, Harvard Medical School, Boston, MA, 02215 USA. <sup>7</sup>Veterans Affairs Boston Healthcare System, Boston MA, USA. <sup>8</sup>Institute of Medical Engineering and Sciences, Massachusetts Institute of Technology, Cambridge, MA, USA.

**Key words:** MINAR2, mTOR, mTORC1, RAPTOR, obesity

**\*Co-corresponding Authors:**

Nader Rahimi

Email: [nrahimi@bu.edu](mailto:nrahimi@bu.edu)

Catherine E Costello

Email: [cecmsms@bu.edu](mailto:cecmsms@bu.edu)

Vipul Chitalia

Email: [vichital@bu.edu](mailto:vichital@bu.edu)

**Acknowledgment and Funding:**

This work was supported in part through a grant from Boston University School of Medicine Genome Science Institute (to C.E.C. and N.R.), the Center of Cross-Organ Vascular Pathology, DOM, BU (VC) and NIH grants R24 GM134210, S10 OD021728, S10 OD010724 (C.E.C.).

**S. Figure 1. MRI analysis shows *Minar2* KO mice have increase fat mass.** (A) MRI analysis of *Minar2* KO and sex- and age-matched control WT mice. F, female, M, Male. (B) The graph is the quantification of adipose tissue (6 weeks old, n=4/group, 2 males and 2 females/group) of MRI analysis.

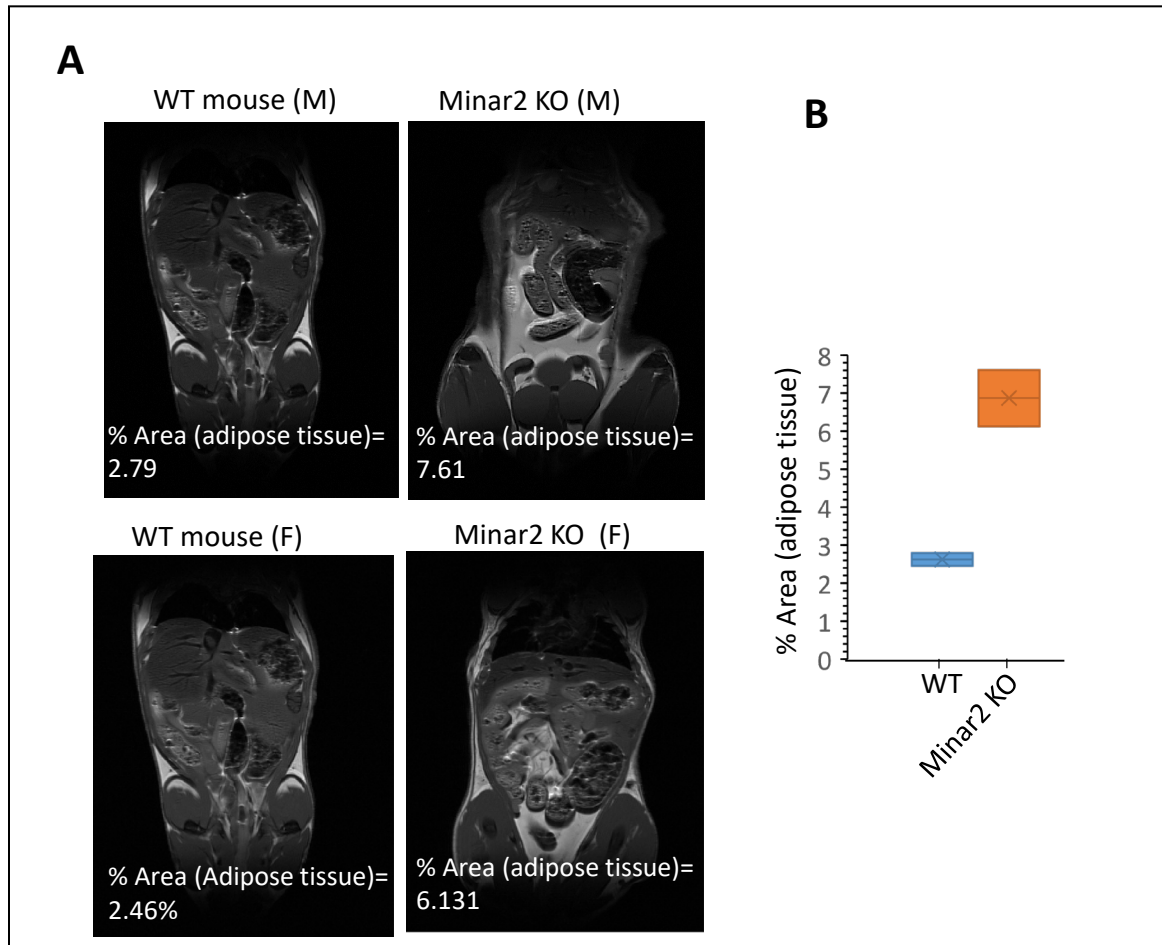

**S. Figure 2. Adipocyte cell numbers are not altered in Minar2 KO mice.** The number of adipocytes from H&E slides were calculated by Image J software. The graph is representative of three randomly but non-overlapping areas per slide, mean  $\pm$  SEM,  $n=3$ ).  $P>0.05$  is considered not significant.

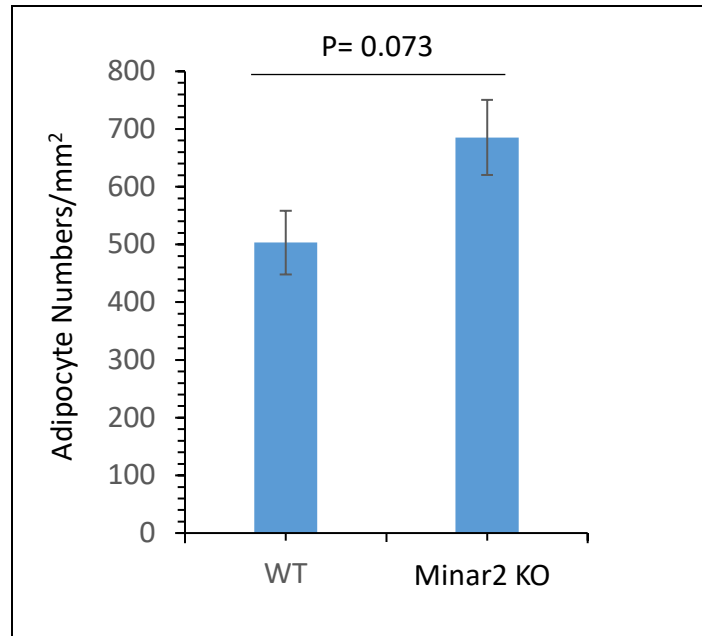

**S. Figure 3. Raptor co-localizes with Minar2.** (A) HEK-293 cells expressing GST-Raptor alone or GST-Raptor with Minar2-emerald (EM) were stained anti-GST antibody. Image magnification 50  $\mu$ M. (B) HEK-293 cells or HEK-293 cells expressing GST-Raptor with calreticulin (CAL) mCherry. Image magnification 50  $\mu$ M. (C) HEK-293 cells or HEK-293 cells co-expressing GST-Raptor and Lysosome20-emerald (EM). Image magnification 50  $\mu$ M.

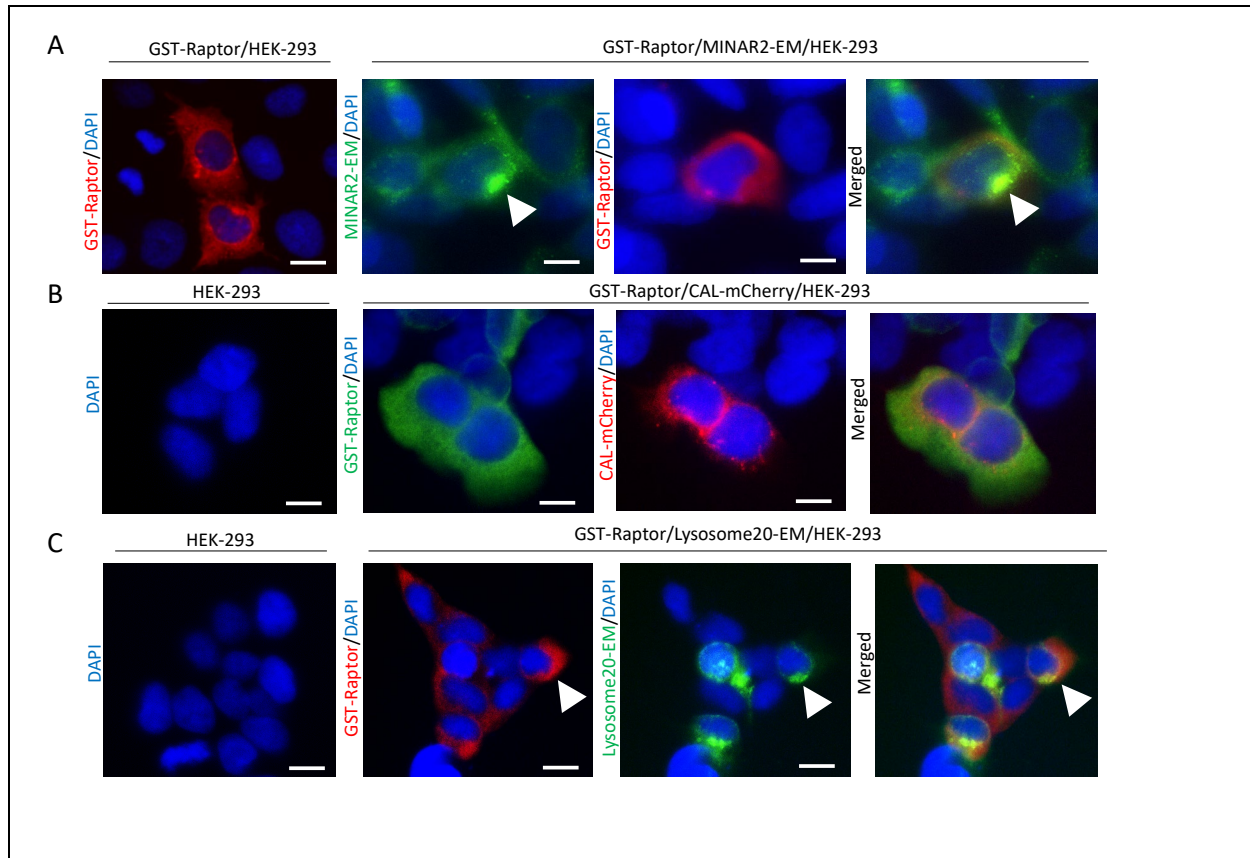

**S. Figure 4. Raptor is phosphorylated on Ser 863 and Ser877.** Higher energy collisional dissociation (HCD) tandem mass spectra of Raptor tryptic phosphor-peptides that contain the S863 and S877 phosphorylation sites. NanoUPLC retention times and fragmentation patterns were matched.

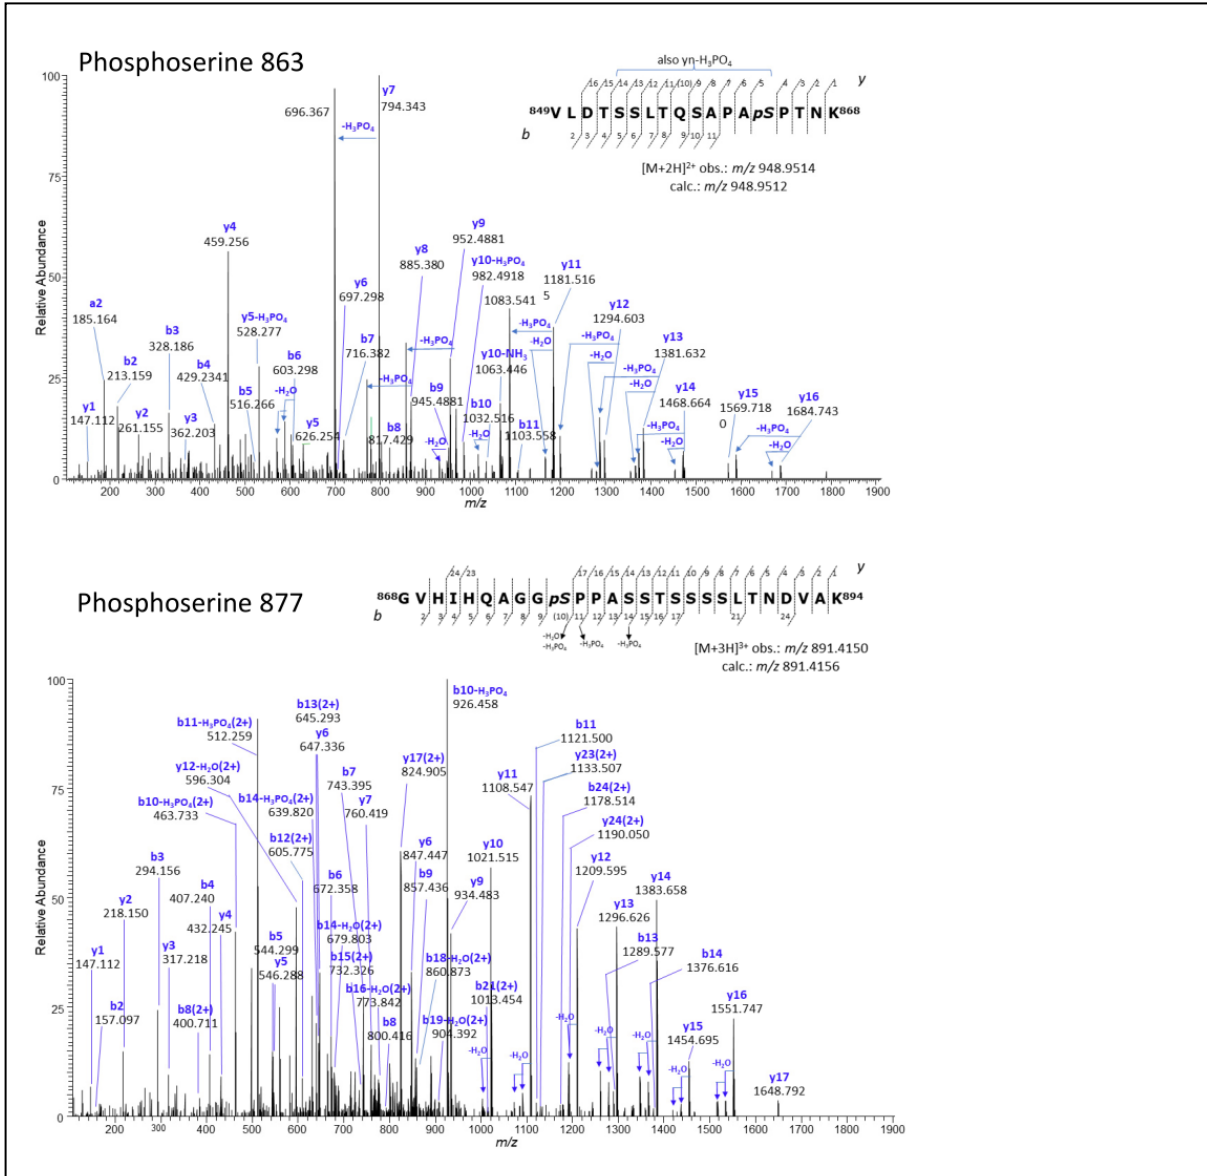

**S. Figure 5. *Minar2* cDNA and vector sequence information. *Minar2* sequence is highlighted in yellow. Myc tag sequence is underlined. Emerald sequence (795bp) is highlighted in green.**

>Minar2-pQCXIP

```
tccgcgttacataacttacggtaaatggcccgcctggctgaccgcccacgacccccgccattgacgtcaataatgacgtatggt
cccatagtaacgccaatagggactttccattgacgtcaatgggtggagtatttacggtaaacctgcccactggcagtagcatcaagg
tatcatatgccaagtacgccccctattgacgtcaatgacggtaaatggcccgcctggcattatgcccagtagcatgaccttatggga
ctttcctacttggcagtagcatctacgtatttagtcatcgctattaccatgggtgatgagggttttggcagtagcatcaatgggcgtggat
agcgggttgactcacgggattttccaagtctccacccattgacgtcaatgggagtttggtttggcaccaaaatcaacgggacttt
ccaaaatgtcgtaacaaactccgccccattgacgcaaatggggcgttagcgtgtacggggaggtctatataagcagagctcaata
aaagagcccacaaccctcactcggcgccagcttccgatagactgctgcgccgggtaccggtattcccaataaagcctcttg
ctgtttgcatccgaatcgtgggtctcgtgttccctgggaggggtctcctctgagtgattgactaccacgacgggggtctttcattt
gggggctcgtccggattttggagaccctcaccaggaccaccgcccaccgggaggttaagctggccagcaacttatctgtgtg
ctgtccgatgttctgattgtttagtattgctttagcctcgtctgtagttagttagtaactagctgtatctggcggaccgg
tgggtggaactgacgagttctgaacaccggccgcaaccctgggagacgtcccagggactttgggggcccgtttttgtggccgacct
gaggaagggagtgatgtggaatccgaccccgtcaggatattgtggttctggtaggagacgagaacctaaaacagttcccgccctccg
tctgaatttttgccttcgggtttggaaccgaagccgcgctctgtctgctgcagcgtgcagcatcgttctgtgtgtctctgtct
gtgtttctgtatattgtctgaaaattagggccagactgttaccactcccttaagtttgaccttaggtcactggaaagatgtcagcgcg
atcgtcacaaaccagtcggtagatgtcaagaagacagcttgggttacctctgtctcgcagaatggccaacctttaacgtcggatg
ccgcgagacggcaccctttaaccgagacctcaccacaggttaagatcaaggtctttcacctggcccgcagtaggacccagaccg
gtccccacatcgtgacctgggaagccttggcctttgacccccctcctgggtcaagccctttgtacacccctaagcctccgcctcc
tcttccctccatccgccccgtctctcccccttgaacctcctcgttcgacccccgcctcgatcctccctttatccagccctcactcctt
ctctaggcgcgggaattgaagatctgggggatcgatcctctagagtcogttacataacttacggtaaatggcccgcctggctgacc
gcccacgacccccgcccattgacgtcaataatgacgtatgttcccatagtaacgccaatagggactttccattgacgtcaatggg
tggagtatttacggtaaacctgcccacttggcagtagcatcaagtgatcatatgccaagtacgccccctattgacgtcaatgacggg
aaatggcccgcctggcattatgcccagtagcatgacctatgggactttcctacttggcagtagcatctacgtatttagtcatcgtat
taccatgggtgatgagggttttggcagtagcatcaatgggcgtgaaatagcgggtttagctcacggggatttccaagctccacccccattg
acgtcaatgggagtttgttttggcaccaaaatcaacgggactttccaaaatgtcgttaacaactccgccccattgacgcaaatgggc
ggtaggcgtgtacgtgggaggtctatataagcagagctcgttttagtgaaccgtcagatcgccctggagacgccatccacgctgtttt
gacctccatagaagacaccgggaccgatccagcctccgcccggcgggaacgggtgcatggaaacgtgcaggaattgatccgcccggccg
cATGGATCTCTCTGTTTGGCAAATAACAACCATCTCGACAAATTCCTGCAGCTTGACGTAAGTCTTTAACGAGGAGCTCAGCCC
TCCTTCAGGCCAGCCTGGTGAGGTTCCGGGTGGAATATCTGCTGCACAACACTGGCAAAACCTTGTCTACTCACAGAGGGAA
AAGAAGAATATTGCTGCTCAACGAATTAGGGGATCCAGTGCAGACAGCCTTGTCACTGCTGATAGCCCCCACCATCCATGTCATC
AGTTATGAAGAATAACCCACTCTATGGTGACCTAAGTTTGGAGGAAGCTATGGAAGAAAGAAAAAGAACCCTCATGGACCATTG
AGGAATATGACAAACATTCCCTGCACACAAACCTCTCTGGACATCTGAAGGAAAACTCTAATGACCTGCGGTTTGGTTGGGAGAC
ATGTACTCTCCAGGTTTGGACACTTTATTGAAAAAGGAAGAGAAAACAAGAGAAGCATTCAAAATTCCTGCTGATGGGTCTGATTTT
ACTTGTGCTTATCTCCATCTTGGTTACCATAGTGACTATCATTACTTTTTTACCAGGATCCAGGGGAACAAAACTCATCTCAGAA
GAGGATCTGTGAAAATTTTCgaattccgcccctctcctccccccccctaactgtaactggccgaagccgcttggaaataagccggtg
tgcgtttgtctatattgttattttccaccatattgcccgtcttttggcaattgtgagggcccggaacctggccctgtcttcttgacga
gcattccttaggggtcttccccctcgcgcaaggaatgcaaggtctgttgaattgtcgtgaaggaagcaggttctctggaagctctct
tgaagacaaaacacgtctgtagcgcacctttgcaagcagcggccccccacctggcgcaggtgctctgcggccaaaagccacg
tgtataagatcacacctgcaaagggcggcacaaccccagtgccacgttgtgagttggatagttgtggaagagtcataatggctctcct
caagcgtattcaacaaggggctgaaggtgcccagaaggtaccccattgtatgggatctgatctgggcctcgtgacatgcttt
acatgtgttttagtcgaggttaaaaaacgtctagggccccccgaaccacggggacgtggttttcccttgaaaaaacagatgataagct
tgccacaaccacaaaggagacgaccttccatgaccgagtagcaagccccaggtgctcctcgcaccgccgacgagctccccggggcc
gtacgcaacctcgcgcgcgcttgcggactaccccgcacgcgccaacccgtcgaccggaccgccaacatcgagcgggtcaccga
gctgcaagaactcttctcaccgcgctcgggctcgacatcggcaaggtgtgggtcgcggagcagcggcgcgctggtgggggacca
cgccggagagcgtcgaagcggggcggtgttgcggagatcggcccgcgcatggccgagttgagcgggtccccggtggcgcgcgag
caacagatggaagggcctcctggcgcgcgaccggcccaaggagcccgcgtggttctggccaccgtcggcgtctcgcggcaaccag
gcaagggctcgggcagcgcgctcgtcctccccgagtgaggcggccgagcgcgcggggtgcccgccttccctggagacctccgcg
ccccgcaacctccccctctacgagcggctcggcttaccgtcaccgcgcagctcgagtgcccgaaggaccgcgcgacctgtgcatg
accgcaagcccgggtcctgacgcccgcacacgacccgcagcggcccgaaccgaaaggagcgcacgacccccatggctccgacccaag
ccgacccggcgccccggcagccccgcacccgccccggagcccaccgactctagtcgagggctgcagcggctgcagagggccagtagggcagt
gcgaactgctccaaaggcactcaaggctttccgagagcactagctgactccatcgagccagtgtagagataagcttatcgat
tagtccaatttgtttaaagacaggatatacgtggtccaggctctagttttagctcaacaatataccagctgaagcctatagagtag
gagccatagataaaaaaaagattttatatttagtctccagaaaaaggggggaatgaaagaccccacctgtaggtttggcaagctagc
ttaagtaacgccattttgcaaggcatggaaaaatacataactgagaatagagaagttcagatcaaggtcaggaacagatggaacag
ggtcgacctagagaaccatcagatgtttccagggtgcccgaaggacctgaaatgacctgtgccttatttgaactaaccaatcag
ttcgtctctcgtctctgttgcgcgcttctgctccccgagctcaataaaagagcccacaacccctcactcggggcgccagctctcc
gattgactgagtcgccccgggtaccctgtatgttccaataaacctcttgcagttgcatcogacttgtggtctcgtctccttgggag
ggtctcctctgagtgattgactaccctcagcgggggtctttcatttgggggctcgtccgggatccgggagaccctgccaggggac
caccgacccaccaccgggaggttaagctggctgcctcgcgcttccggtgatgacggtgaaaacctctgacacatgcagctccccga
```



ATGACCGACCAAGCGACGCCAACCTGCCATCACGAGATTTTCGATTCACCCGCGCCTTCTATGAAAAGTTGGGCTTCGGAATCGT  
TTTCCGGGACGCCGCTGGATGATCCTCCAGCGCGGGGATCTCATGCTGGAGTTCTTCGCCACCCCGGGCTCGATCCCTCGCGA  
GTTGGTTCAGCTGCTGCTGAGGCTGGACGACCTCGCGGAGTTTACCAGGAGTGCAAAATCCGTCGGCATCCAGGAAACCAGCAGC  
GGCTATCCGCGCATCCATGCCCCGAACCTGCAGGAGTGGGGAGGCACGATGGCCGCTTTGGTTCGAGGCGGATCCGGCCATTAGCCA  
TATTATTCATTGGTTATATAGCATAAATCAATATTGGCTATTGGCCATTGCATACGTTGTATCCATATCATAAATATGTACATTTAT  
ATTGGCTCATGTCCAACATTACCGCCATGTTGACATTGATTATTGACTAGTTATTAATAGTAATCAATTACGGGGTCATTAGTTCA  
TAGCCATATATGGAGTTCGCGTTACATAACTTACGGTAAATGGCCGCTGGCTGACCGCCCAACGACCCCGCCATTGACGT  
CAATAATGACGTATGTTCCCATAGTAACGCCAATAGGGACTTTCCATTGACGTCAATGGGTGGAGTATTTACGGTAAACTGCCAC  
TTGGCAGTACATCAAGTGTATCATATGCCAAGTACGCCCTATTGACGTCAATGACGGTAAATGGCCCGCCTGGCATTATGCCCA  
GTACATGACCTTATGGGACTTTCCTACTTGGCAGTACATCTCGTATTAGTCATCGCTATTACCATGGTGTAGCGGTTTTGGCAGT  
ACATCAATGGGCGTGGATAGCGGTTGACTCAGCGGGATTTCAGTAAGTCTCCACCCATTGACGTCAATGGGAGTTGTTTTGGCAG  
CAAAATCAACGGGACTTTCCAAAATGTCGTAACAACCTCGCCCATTTGACGCAAAATGGGCGGTAGGCACTGTACGTTGGAGGTTCTA  
TATAAGCAGAGCTCGTTTAGTGAACCGTCAGATCGCTGGAGACGCCATCCACGCTGTTTTGACCTCCATAGAAGACCCGGGACG  
ATCCAGCTCCGCGGCCCGTTAACGCGGCCG**ATGGATCTCTCTGTTTTGCCAAATAACAACCATCCTGACAAATTCCTGCAGT**  
**TGACGTAAAGTCTTTAACGAGGAGCTCAGCCCTCCTCAGGCCAGCTGGTGGGTTTCCGGGTGAAAATTATCCTGCTGCACAAAC**  
**ACTGGCAAAACCTTGCTACTCACAGAGGGAAAAGAATATTGCTGCTCAACGAATTAGGGGATCCAGTGCAGACAGCCTTGTC**  
**ACTGCTGATAGCCCCCACCATCCATGTATCAGTTATGAAGAATAACCCACTCTATGGTACCTAAGTTTGGAGGAAGCTATGGA**  
**AGAAAGAAAAAGAACCCCTCATGGACCATTTGAGGAATATGACAAACATTTCCCTGCACACAAACCTCTCTGGACATCTGAAGGAAA**  
**ATCCTAATGACCTGCGGTTTTGGTTGGGAGACATGTACACTCCAGGTTTTGACACTTTATTGAAAAAGGAAAGAGAAAACAAGAGAAG**  
**CATTCAAAATTCCTGTCGTATGGGCTGATTTTACTTGTGCTTATCTCCATCTGGTTACCATAGTACTATCATTACTTTTTTTCAC**  
**CAAGCTTGCATCCGGCGGTAGCGCGGTGGCAGCGGACCGGTGCCACCATGGTGAGCAAGGGCGAGGAGCTGTTACCCGGGGTGG**  
**TGCCATCCTGGTTCGAGCTGGACGGCGACGTAACCGGCCACAAGTTACAGCTGTCCGGCGAGGGCGAGGGCGATGCCACCTACGGC**  
**AAGCTGACCTGAAGTTCATCTGCACCACCGGCAAGCTGCCCGTGCCCTGGCCACCCTCGTGACCACCTTGACCTACGGCGTGCA**  
**GTGCTTCGCCCGCTACCCGACCACATGAAGCAGCAGCACTTCTCAAGTCCGCCATGCCCGAAGGCTACCCGAGGCGCACCA**  
**TCTTCTCAAGGACGACGGCAACTACAAGACCCGCGCCGAGGTGAAGTTCGAGGGCGACACCTTGGTGAACCCGATCGAGCTGAAG**  
**GGCATCGACTTCAAGGAGGACGGCAACATCCTGGGGCACAAGCTGGAGTACAACACAACAGCCACAAGGTCTATATCACCGCCGA**  
**CAAGCAGAAGAACGGCATCAAGGTGAACCTCAAGACCCGCCACAACATCGAGGACGGCAGCGTGCAGCTCGCCGACCCTACCAGC**  
**AGAACACCCCATCGCGACGGCCCGTGTGCTGCTGCCGACAACCCTACCTGAGCACCCAGTCCAAGCTGAGCAAAGACCCCAAC**  
**GAGAAGCGCGATCACATGGTCTGCTGGAGTTCGTGACCGCCCGCGGGATCCTCTCGGCATGGACGAGCTGTACAAGTAAGCGGC**  
**CGCGACTCTAGATCATAATCAGCCAT**TGA**GTTCGACAAAATAAAAGATTTTATTTAGTCTCCAGAAAAAGGGGGGAATGAAAGACC**  
**ACCTGTAGTTTGGCAAGCTAGCTTAAGTAACGCCATTTTGCAGGCATGGAAAAATACATAACTGAGAATGAGAAGTTCCAGATC**  
**AAGTTCAGGAACAGATGGAACAGCTGAATATGGGCCAAACAGGATATCTGTGGTAAGCAGTTCTGCCCCGGCTCAGGGCCAAGAA**  
**CAGATGGAACAGCTGAATATGGGCCAAACAGGATATCTGTGGTAAGCAGTTCTGCCCCGGCTCAGGGCCAAGAACAGATGGTCCC**  
**CAGATGCGGTCCAGCCCTCAGCAGTTTCTAGAGAACCATCAGATGTTTCCAGGGTGCCCCAAGGACCTGAAATGACCTGTGCCCT**  
**ATTTGAACATAACCAATCAGTTTCGCTTCTCGCTTCTGTTTCGCGCGTCTGCTCCCCGAGCTCAATAAAAGAGCCACAACCCCTCA**  
**CTCGGGGCGCCAGTCTCCGATTGACTGAGTTCGCCCCGGTACCCTGTATCCAATAAACCCCTCTTGACAGTTGCATCCGACTTGTGG**  
**TCTCGCTGTTTCTGGGAGGCTCCTCTGAGTGATTGACTACCCGTACGCGGGGCTTTTCAATTTGGGGGCTCGTCCGGGATCGG**  
**GAGACCCCTGCCAGGACCCGACCCACCCACCCGAGGAGGTAAGCTGGCTGCCCTGCGCGTTTTCCGTTGATGACGTTACAAAACCTCT**  
**GACACATGCAGCTCCCGGAGACGGTACAGCTTGTCTGTAAGCGGATGCCGGGAGCAGACAAGCCGCTCAGGGCGCGTACGCGGGT**  
**GTTGGCGGGTGTGGGGGCGAGCCATGACCCAGTACAGTACGATAGCGGAGTGTATACTGGCTTAACATGCGGCATCAGAGAGA**  
**TTGTACTGAGAGTGCACCATATGCGGTGTGAAATACCGCACAGATGCGTAAGGAGAAAATACCGCATCAGGCGCTCTTCCGCTTCG**  
**CTACTGACTCGCTCGCTCGGTCGTTCCGGTGCAGCGAGCGGATCAGCTCAAAAGGCGGTAATACGGTTATCCACAGAATC**  
**AGGGGATAACGCAGGAAAGAATGTGAGCAAAAGGCCAGCAAAAGGCCAGGAACCGTAAAAAGGCCGCGTGTGCTGGCGTTTTCCA**  
**TAGGCTCCGCCCCCTGACGAGCATCAAAAAATCGAGCTCAAGTACAGAGTGGCGAAACCCGACAGGACTATAAAGATACAGG**  
**CGTTTTCCCTGGAAGCTCCTCTGCGCTCTCCTGTTCCGACCTGCTCCGCTTACCAGTACCTGCTCCGCTTCCCTTCGGTA**  
**AGCGTGGCGTTTTCTCATAGCTCACGCTGTAGGTATCTCAGTTCGGTGTAGGTGCTTCCGCTCCAAGCTGGGCTGTGTGCACGAACC**  
**CCCCGTTACGCCGACCGCTGCGCCTTATCCGGTAACTATCGTCTTGAGTCCAACCCGGAAGACACGACTTATCGCCACTGGCAG**  
**CAGCCACTGGTAACAGGATTAGCAGAGCGAGGTATGTAGGCGGTGTACAGAGTCTTGAAGTGGTGGCCTAATACGGCTACACT**  
**AGAAGGACAGTATTTGGTATCTGCGCTCTGCTGAAGCCAGTTACCTTCGGAAAAAGAGTTGGTAGCTCTTGATCCGGCAAAACAAC**  
**CACCGCTGGTAGCGGTGGTTTTTTTTGTTTGAAGCAGCAGATTACGCGCAAAAAAAGGATCTCAAGAAGATCCTTTGATCTTTT**  
**CTACGGGCTGACGCTCAGTGGAAACGAAAACCTCAGTCAAGGATTTTGGTTCATGAGATATCAAAAAGGATCTTACCTAGATC**  
**CTTTTAAATTAATAAATGAAGTTTTAAATCAATCTAAAGTATATATGAGTAAACTTGGTCTGACAGTTACCAATGCCTAATCAGTGA**  
**GGCACCTATCTCAGCGATCTGTCTATTTTCGTTTCCATCAGTGTGCTGACTCCCGCTCGTGTAGATAACTACGATACGGGAGGGCT**  
**TACCATCTGGCCCCAGTGTGCAATGATACCGCGAGACCCACGCTCACCGGCTCCAGATTTATCAGCAATAAACAGCCAGCCGAA**  
**GGGCCGAGCGCAGAAGTGGTCTGCAACTTTATCCGCTCCATCCAGTCTATTAATTTGTTGCCGGGAAGCTAGAGTAAGTAGTCCG**  
**CAGTTAATAGTTTGGCAACGTTGTTGCCATTGCTGCAGGCATCGTGGTGTACGCTCGTTCGTTTGGTATGGCTTCAATCAGCTCC**  
**GTTCCCAACGATCAAGGCGAGTTACATGATCCCCATGTTGTGCAAAAAAGCGGTTAGCTCCTTCGGTCCCGATCGTTGCTAG**  
**AGTAAGTTGGCCGAGTGTATCACTCATGGTTATGGCAGCACTGCATAAATTCCTTACTGTATGCCATCCGTAAGATGCTTTTCT**  
**GTGACTGGTGTAGTACTCAACCAAGTCATTCTGAGAATAGTGTATGCGGCGACCGAGTTGCTCTTGGCCGGCGTCAACACGGGATAA**  
**TACCGCGCCACATAGCAGAACTTTAAAAGTGTCTCATCATTGAAAAAGCTTCTTCGGGGCGAAAACCTCAAGGATCTTACCGCTGT**  
**TGAGATCCAGTTTCGATGTAACCCACTCGTGCACCCAACTGATCTTACGATCTTTTACTTTTACCAGCGTTTTCTGGGTGAGCAAAA**  
**ACAGGAAGGCAAAATGCCGCAAAAAGGGAATAAGGGCGACACGAAAATGTTGAATACTCATACTCTTCTTTTTTCAATATTATG**  
**AAGCATTTATCAGGGTTATTGTCTCATGAGCGGATACATATTTGAATGTATTTAGAAAAATAACAATAAGGGTTCCGCGCACAT**



TTCCCGAAAAGTGCCACCTGACGTCTAAGAAACCATTATTATCATGACATTAACCTATAAAAAATAGGCGTATCAGAGGCCCTT  
CGTCTCAAGAATTCATACCAGATCACCGAAAACGTCTCCAAATGTGTCCCCCTCACACTCCCAAATTCGCGGGCTTCTGCCTC  
TTAGACCACTCTACCCTATTCCCCACACTCACCGGAGCCAAAGCCGCGGCCCTCCGTTTCTTTGCT
